# Supplementary material for: Characterization of Severity in Zellweger Spectrum Disorder by Clinical Findings: A Scoping Review, Meta-Analysis and Medical Chart Review
Source: MDPI journal article supplement (doi:10.3390/cells11121891), 2022-06-10
Supplement: s1 [file s1]

|                               | Probability (95% CI) of being: |                     |                      |
|-------------------------------|--------------------------------|---------------------|----------------------|
| Plasma C26:0 level<br>( g/mL) | Severe                         | Intermediate        | Mild                 |
| 0.2                           | 0.21 (0.00-0.64)               | 7.33 (0.00-15.18)   | 92.45 (84.40-100.00) |
| 0.26                          | 0.26 (0.00-0.75)               | 8.54 (0.01-17.08)   | 91.20 (82.42-99.98)  |
| 0.28                          | 0.27 (0.00-0.80)               | 8.99 (0.22-17.75)   | 90.74 (81.72-99.76)  |
| 0.33                          | 0.32 (0.00-0.92)               | 10.18 (0.84-19.52)  | 89.50 (79.88-99.12)  |
| 0.34                          | 0.33 (0.00-0.95)               | 10.44 (0.98-19.89)  | 89.23 (79.49-98.97)  |
| 0.36                          | 0.35 (0.00-1.00)               | 10.96 (1.28-20.65)  | 88.68 (78.71-98.66)  |
| 0.38                          | 0.37 (0.00-1.06)               | 11.51 (1.60-21.43)  | 88.11 (77.90-98.33)  |
| 0.39                          | 0.39 (0.00-1.09)               | 11.80 (1.77-21.82)  | 87.82 (77.48-98.15)  |
| 0.41                          | 0.41 (0.00-1.15)               | 12.38 (2.13-22.63)  | 87.21 (76.64-97.77)  |
| 0.43                          | 0.44 (0.00-1.21)               | 12.99 (2.52-23.46)  | 86.57 (75.77-97.37)  |
| 0.45                          | 0.46 (0.00-1.28)               | 13.63 (2.94-24.32)  | 85.91 (74.88-96.93)  |
| 0.46                          | 0.48 (0.00-1.32)               | 13.96 (3.16-24.75)  | 85.56 (74.43-96.70)  |
| 0.48                          | 0.51 (0.00-1.39)               | 14.63 (3.63-25.63)  | 84.86 (73.51-96.21)  |
| 0.51                          | 0.56 (0.00-1.51)               | 15.69 (4.38-27.00)  | 83.75 (72.08-95.43)  |
| 0.53                          | 0.59 (0.00-1.59)               | 16.43 (4.93-27.94)  | 82.98 (71.09-94.86)  |
| 0.54                          | 0.61 (0.00-1.63)               | 16.82 (5.21-28.42)  | 82.58 (70.59-94.56)  |
| 0.55                          | 0.63 (0.00-1.67)               | 17.20 (5.51-28.90)  | 82.17 (70.09-94.25)  |
| 0.57                          | 0.66 (0.00-1.76)               | 18.00 (6.12-29.88)  | 81.34 (69.06-93.61)  |
| 0.58                          | 0.68 (0.00-1.81)               | 18.41 (6.43-30.38)  | 80.91 (68.54-93.28)  |
| 0.6                           | 0.72 (0.00-1.91)               | 19.25 (7.10-31.40)  | 80.03 (67.47-92.59)  |
| 0.63                          | 0.79 (0.00-2.06)               | 20.56 (8.15-32.96)  | 78.66 (65.84-91.47)  |
| 0.65                          | 0.83 (0.00-2.17)               | 21.47 (8.90-34.03)  | 77.70 (64.71-90.69)  |
| 0.66                          | 0.86 (0.00-2.22)               | 21.93 (9.29-34.57)  | 77.21 (64.14-90.28)  |
| 0.67                          | 0.88 (0.00-2.28)               | 22.40 (9.68-35.12)  | 76.72 (63.57-89.86)  |
| 0.69                          | 0.93 (0.00-2.39)               | 23.37 (10.50-36.23) | 75.70 (62.40-89.01)  |
| 0.77                          | 1.16 (0.00-2.91)               | 27.49 (14.08-40.90) | 71.35 (57.48-85.22)  |
| 0.78                          | 1.19 (0.00-2.98)               | 28.04 (14.56-41.51) | 70.78 (56.84-84.71)  |
| 0.82                          | 1.32 (0.00-3.27)               | 30.28 (16.56-44.00) | 68.41 (54.22-82.59)  |
| 0.86                          | 1.45 (0.00-3.58)               | 32.61 (18.65-46.57) | 65.94 (51.51-80.37)  |

|                               | Probability (95% CI) of being: |                     |                     |
|-------------------------------|--------------------------------|---------------------|---------------------|
| Plasma C26:0 level<br>( g/mL) | Severe                         | Intermediate        | Mild                |
| 0.93                          | 1.72 (0.00-4.17)               | 36.87 (22.48-51.26) | 61.41 (46.55-76.26) |
| 0.94                          | 1.76 (0.00-4.25)               | 37.50 (23.05-51.95) | 60.74 (45.82-75.66) |
| 0.95                          | 1.80 (0.00-4.34)               | 38.13 (23.61-52.64) | 60.07 (45.09-75.05) |
| 0.96                          | 1.85 (0.00-4.44)               | 38.76 (24.18-53.33) | 59.40 (44.35-74.44) |
| 1.02                          | 2.11 (0.00-5.01)               | 42.61 (27.64-57.57) | 55.28 (39.85-70.71) |
| 1.03                          | 2.16 (0.00-5.10)               | 43.25 (28.22-58.29) | 54.59 (39.09-70.09) |
| 1.08                          | 2.40 (0.00-5.61)               | 46.51 (31.14-61.87) | 51.10 (35.27-66.92) |
| 1.16                          | 2.81 (0.00-6.47)               | 51.69 (35.81-67.58) | 45.50 (29.17-61.82) |
| 1.23                          | 3.19 (0.00-7.25)               | 56.13 (39.86-72.39) | 40.68 (24.00-57.36) |
| 1.24                          | 3.25 (0.00-7.37)               | 56.74 (40.43-73.06) | 40.01 (23.29-56.73) |
| 1.29                          | 3.54 (0.00-7.94)               | 59.78 (43.28-76.27) | 36.69 (19.82-53.56) |
| 1.35                          | 3.89 (0.00-8.63)               | 63.24 (46.64-79.84) | 32.87 (15.94-49.79) |
| 1.44                          | 4.44 (0.00-9.68)               | 68.02 (51.52-84.51) | 27.54 (10.84-44.24) |
| 1.49                          | 4.75 (0.00-10.26)              | 70.42 (54.13-86.71) | 24.82 (8.41-41.23)  |
| 1.51                          | 4.88 (0.00-10.49)              | 71.33 (55.15-87.52) | 23.79 (7.53-40.05)  |
| 1.62                          | 5.57 (0.00-11.72)              | 75.80 (60.44-91.15) | 18.63 (3.48-33.78)  |
| 1.63                          | 5.64 (0.00-11.83)              | 76.16 (60.89-91.42) | 18.21 (3.18-33.23)  |
| 1.66                          | 5.83 (0.00-12.16)              | 77.19 (62.22-92.17) | 16.98 (2.35-31.62)  |
| 1.71                          | 6.15 (0.00-12.71)              | 78.77 (64.31-93.23) | 15.09 (1.15-29.03)  |
| 1.75                          | 6.40 (0.00-13.13)              | 79.90 (65.87-93.94) | 13.70 (0.35-27.04)  |
| 1.78                          | 6.59 (0.00-13.45)              | 80.68 (66.97-94.39) | 12.73 (0.00-25.61)  |
| 1.79                          | 6.65 (0.00-13.56)              | 80.93 (67.33-94.53) | 12.42 (0.00-25.15)  |
| 1.94                          | 7.61 (0.13-15.10)              | 83.89 (71.85-95.94) | 8.49 (0.00-18.84)   |
| 1.96                          | 7.74 (0.19-15.30)              | 84.20 (72.34-96.05) | 8.06 (0.00-18.09)   |
| 2.05                          | 8.32 (0.45-16.19)              | 85.31 (74.20-96.42) | 6.36 (0.00-15.02)   |
| 2.08                          | 8.52 (0.55-16.49)              | 85.60 (74.71-96.50) | 5.88 (0.00-14.10)   |
| 2.22                          | 9.44 (1.01-17.88)              | 86.53 (76.36-96.70) | 4.03 (0.00-10.39)   |
| 2.3                           | 9.98 (1.29-18.67)              | 86.78 (76.84-96.72) | 3.24 (0.00-8.68)    |
| 2.31                          | 10.05 (1.33-18.77)             | 86.80 (76.88-96.72) | 3.15 (0.00-8.48)    |

|                               | Probability (95% CI) of being: |                     |                  |
|-------------------------------|--------------------------------|---------------------|------------------|
| Plasma C26:0 level<br>( g/mL) | Severe                         | Intermediate        | Mild             |
| 2.35                          | 10.32 (1.47-19.18)             | 86.86 (77.00-96.72) | 2.82 (0.00-7.74) |
| 2.42                          | 10.81 (1.73-19.89)             | 86.87 (77.05-96.68) | 2.32 (0.00-6.58) |
| 2.46                          | 11.10 (1.89-20.30)             | 86.83 (77.01-96.65) | 2.08 (0.00-5.99) |
| 2.5                           | 11.38 (2.04-20.72)             | 86.76 (76.91-96.61) | 1.86 (0.00-5.45) |
| 2.59                          | 12.04 (2.40-21.69)             | 86.51 (76.54-96.48) | 1.44 (0.00-4.40) |
| 2.64                          | 12.42 (2.60-22.24)             | 86.33 (76.25-96.40) | 1.25 (0.00-3.90) |
| 2.65                          | 12.49 (2.64-22.35)             | 86.29 (76.19-96.38) | 1.22 (0.00-3.80) |
| 2.78                          | 13.51 (3.16-23.85)             | 85.65 (75.19-96.11) | 0.84 (0.00-2.77) |
| 2.89                          | 14.41 (3.61-25.20)             | 84.97 (74.12-95.83) | 0.62 (0.00-2.11) |
| 3.01                          | 15.44 (4.10-26.77)             | 84.12 (72.76-95.49) | 0.44 (0.00-1.56) |
| 3.2                           | 17.17 (4.85-29.49)             | 82.58 (70.26-94.90) | 0.25 (0.00-0.96) |
| 3.23                          | 17.46 (4.97-29.94)             | 82.31 (69.82-94.80) | 0.23 (0.00-0.89) |
| 3.27                          | 17.84 (5.12-30.57)             | 81.95 (69.23-94.67) | 0.21 (0.00-0.81) |
| 3.37                          | 18.84 (5.49-32.19)             | 81.01 (67.66-94.35) | 0.16 (0.00-0.62) |
| 3.38                          | 18.94 (5.52-32.36)             | 80.91 (67.50-94.32) | 0.15 (0.00-0.61) |
| 3.39                          | 19.04 (5.56-32.52)             | 80.81 (67.33-94.29) | 0.15 (0.00-0.59) |
| 3.54                          | 20.62 (6.07-35.17)             | 79.29 (64.74-93.83) | 0.09 (0.00-0.40) |
| 3.76                          | 23.10 (6.74-39.46)             | 76.85 (60.49-93.21) | 0.05 (0.00-0.22) |
| 4.18                          | 28.37 (7.74-49.01)             | 71.61 (50.98-92.24) | 0.01 (0.00-0.07) |
| 4.59                          | 34.16 (8.54-59.79)             | 65.83 (40.21-91.45) | 0.00 (0.00-0.02) |
| 5.18                          | 43.34 (10.06-76.63)            | 56.65 (23.37-89.94) | 0.00 (0.00-0.00) |
| 5.92                          | 55.46 (14.32-96.59)            | 44.54 (3.41-85.68)  | 0.00 (0.00-0.00) |
| 8.8                           | 89.23 (60.13-100.00)           | 10.77 (0.00-39.87)  | 0.00 (0.00-0.00) |
| 8.84                          | 89.48 (60.79-100.00)           | 10.52 (0.00-39.21)  | 0.00 (0.00-0.00) |

**Supplementary Table S3. Multinomial logistic model results for predicted probabilities of each severity category by C26:0 fatty acid levels.**
