# Supplementary material for: Characterization of Severity in Zellweger Spectrum Disorder by Clinical Findings: A Scoping Review, Meta-Analysis and Medical Chart Review
Source: MDPI journal article supplement (doi:10.3390/cells11121891), 2022-06-10
Supplement: s1 [file s1]

|                              | For all ages<br>Probability (95% CI) (%) of being:                                  |                     |                     |
|------------------------------|-------------------------------------------------------------------------------------|---------------------|---------------------|
| Number of clinical findings* | Severe                                                                              | Intermediate        | Mild                |
| 0                            | 0.67 (0.00-1.80)                                                                    | 45.14 (33.82-56.47) | 54.19 (42.78-65.60) |
| 1                            | 4.64 (0.00-9.42)                                                                    | 61.19 (50.57-71.82) | 34.16 (23.82-44.51) |
| 2                            | 23.56 (11.55-35.56)                                                                 | 60.69 (46.78-74.60) | 15.76 (4.76-26.75)  |
| 3                            | 63.93 (44.96-82.90)                                                                 | 32.19 (14.60-49.77) | 3.89 (0.00-8.84)    |
| 4                            | 90.59 (78.92-100.00)                                                                | 8.91 (0.00-20.04)   | 0.50 (0.00-1.52)    |
|                              | For clinical findings presenting <2 years old<br>Probability (95% CI) (%) of being: |                     |                     |
| Number of clinical findings* | Severe                                                                              | Intermediate        | Mild                |
| 0                            | 0.65 (0.00-1.78)                                                                    | 47.62 (37.44-57.79) | 51.74 (41.48-61.99) |
| 1                            | 9.12 (0.36-17.89)                                                                   | 80.64 (66.19-95.08) | 10.24 (0.00-23.08)  |
| 2                            | 48.12 (26.28-69.96)                                                                 | 51.12 (29.47-72.77) | 0.76 (0.00-2.89)    |
| 3                            | 88.66 (74.26-100.00)                                                                | 11.32 (0.00-25.70)  | 0.02 (0.00-0.11)    |
| 4                            | 98.49 (95.17-100.00)                                                                | 1.51 (0.00-4.83)    | 0.00 (0.00-0.00)    |

**Supplementary Table S2. Multinomial logistic model results for predicted probabilities of each severity category by number of clinical findings.**

\*Clinical findings include seizure disorder, abnormal EEG, bilateral renal cortical microcysts and cardiac abnormalities.
